# Supplementary material
Source: MDPI journal article supplement (https://www.mdpi.com/2077-0472/13/12/2263)
Supplement: s1 [file s1]

### Survey on Agricultural Household Grain Production

Dear Sir/Madam,

Thank you for participating in this academic survey. Its aim is to learn about the grain cultivation situation of farmers in the Guanzhong Plain, Shaanxi Province. Your responses will be confidential and used solely for academic research and analysis. We appreciate your cooperation and kindly request you to reply based on your family's present situation. Thank you for your valuable participation.

Questionnaire Number: \_\_\_\_\_; Survey Date: \_\_\_\_\_; Survey Location: Province \_\_\_\_\_ City (County) \_\_\_\_\_ Town (Township) \_\_\_\_\_ Village \_\_\_\_\_.

#### *A Basic Information of Interviewed Farm Household*

A1 Gender of household head: (1. Male, 0. Female); Age of the household head: \_\_\_\_\_ years; Years of education: \_\_\_\_\_ years; Health status: \_\_\_\_\_ (1. Very unhealthy; 2. Somewhat unhealthy; 3. Average; 4. Somewhat healthy; 5. Very healthy).

A2 Number of household members: \_\_\_\_\_; Labor force: \_\_\_\_\_; Female labor force: \_\_\_\_\_; Male labor force: \_\_\_\_\_; Labor force aged 60 and above: \_\_\_\_\_; Engaged in agricultural labor: \_\_\_\_\_; Engaged in off-farm work: \_\_\_\_\_.

A3 Is your family the largest clan in the village? \_\_\_\_\_ (1. Yes; 0. No) What percentage of the village population does your family name represent? \_\_\_\_\_ What percentage of the village population does the largest clan's name represent? \_\_\_\_\_

A4 What is the distance between your household and the township government in meters? \_\_\_\_\_ What is the distance between your household and the nearest agricultural market in meters? \_\_\_\_\_ What is the distance between your household and the main highway in meters? \_\_\_\_\_

A5 Has your household participated in agricultural technical training? \_\_\_\_\_ (1. Yes; 0. No)

A6 Does your village provide machinery subsidies? \_\_\_\_\_ (1. Yes; 0. No) Does your village have mechanized farming roads? \_\_\_\_\_ (1. Yes; 0. No)

#### *B Management of Farmland by Farm Household*

B1 How many plots of farmland do you have in total? \_\_\_\_\_ The total area is \_\_\_\_\_ mu (sum of B3). Is your land properly registered and titled? \_\_\_\_\_ (1. Yes, 0. No). In what year was it registered? \_\_\_\_\_ Have you made any adjustments to your land registration? \_\_\_\_\_ (1. Yes, 0. No). In what year was it adjusted? \_\_\_\_\_

| Lid            | B2                                      | B3             | B4                  | B5               | B6            | B7         | B8                                               | B9                                               |
|----------------|-----------------------------------------|----------------|---------------------|------------------|---------------|------------|--------------------------------------------------|--------------------------------------------------|
| Land plot code | What crop is planted on this land plot? | Land plot area | Yield per unit area | Total production | Quantity sold | Sale price | Did the land plot suffer from pests or diseases? | Did the land plot suffer from natural disasters? |

B10 Did your household receive grain subsidies? \_\_\_\_ (1. Yes, 0. No) If yes, please specify the type of subsidy received: \_\_\_\_ (1. Direct Grain Subsidy, 2. Improved Seed Subsidy, 3. Seedling Planting Subsidy, 4. Comprehensive Agricultural Input Subsidy, 5. Pest and Disease Control Subsidy, 6. Agricultural Machinery Purchase Subsidy, 7. Land Rental Subsidy, 8. Agricultural Insurance Subsidy, 9. Other Subsidy). How satisfied are you with the subsidies received? \_\_\_\_ (1. Very dissatisfied, 2. Not very satisfied, 3. Neutral, 4. Mostly satisfied, 5. Very satisfied)

C1 Did you pay for land preparation services during the grain production process? \_\_\_\_ (1. Yes, 0. No) Did you pay for planting services during the grain production process? \_\_\_\_ (1. Yes, 0. No) Did you pay for fertilization services during the grain production process? \_\_\_\_ (1. Yes, 0. No) Did you pay for pest control services during the grain production process? \_\_\_\_ (1. Yes, 0. No) Did you pay for harvesting services during the grain production process? \_\_\_\_ (1. Yes, 0. No)

[illegible]

- (a) 1. Insufficient labor force at home; 2. Infeasible to commute back and forth for off-farm work; 3. Poor physical fitness; 4. Inadequate technical skills; 5. Lack of equipment; 6. Limited time availability; 7. Convenience.
- (b) 1. Very dissatisfied; 2. Not very satisfied; 3. Neutral; 4. Mostly satisfied; 5. Very satisfied.
- (c) 1. High prices; 2. Poor quality; 3. Insufficient local agricultural machinery; 4. Lack of convenience.
- (d) 1. Other farmers; 2. Cooperative organizations; 3. Village collective; 4. Agricultural companies; 5. Agricultural technology departments; 6. Government; 7. Research institutions.
- (e) 1. Grains; 2. Treating to a meal; 3. Gifts; 4. Mutual assistance.
- (f) 1. Service not available; 2. High prices; 3. Difficulties in ensuring quality; 4. Own machinery available; 5. Sufficient labor force at home.

#### ***D Risks in Grain Production Operations***

D1 Do you consider the current grain production to be risky or not? \_\_\_\_ (1. No risk; 2. Not very high risk; 3. Neutral; 4. Mostly high risk; 5. Very high risk.)

D2 What are the main risks you face in grain production? Please select the relevant options for yield risk: \_\_\_\_ (1. Pest and disease infestation; 2. Irrigation conditions; 3. Lack of expertise in farming techniques; 4. Natural disasters; 5. Poor seed quality; 6. Other)

D3 What are the main risks you face in grain production? Please select the relevant options for market risk: \_\_\_\_ (1. High price fluctuations; 2. Supply and demand changes; 3. Difficulties in transportation and distribution; 4. Rice supply from other provinces; 5. Pressure from traders to lower prices)

D4 What are the main risks you face in grain production? Please select the relevant options for climate risk: \_\_\_\_ (1. Increasing frequency of extreme weather events like droughts and floods; 2. Increased costs due to weather changes\_)

D5 What other risks do you face in grain production? Please select the relevant options: \_\_\_\_ (1. Inadequate agricultural insurance coverage; 2. Uncertainty in fixed investments; 3. Risk of land being reclaimed at any time; 4. Weak willingness to engage in grain production.)
